# Supplementary material
Source: PubMed Central journal article supplement (PMC3834255)
Supplement: NIHMS527748-supplement-ESI.pdf [file NIHMS527748-supplement-ESI.pdf]

## **Supplementary Information**

# **Binding Structures and Energies of Human Neonatal Fc Receptor with Human Fc and Its Mutants by Molecular Modeling and Dynamics Simulations**

Xiaoqin Huang, Fang Zheng, and Chang-Guo Zhan\*

*Department of Pharmaceutical Sciences, College of Pharmacy, University of Kentucky, 789 South Limestone Street, Lexington, Kentucky 40536*

**Running title:** Human FcRn-Fc Binding Structure

### **Correspondence:**

Chang-Guo Zhan, Ph.D.

Professor

Department of Pharmaceutical Sciences

College of Pharmacy

University of Kentucky

789 South Limestone Street

Lexington, KY 40536

TEL: 859-323-3943

FAX: 859-323-3575

E-mail: [zhan@uky.edu](mailto:zhan@uky.edu)

---

\*Corresponding author. E-mail: [zhan@uky.edu](mailto:zhan@uky.edu)

Table S1. Calculated Fc mutation-caused shifts ( $\Delta\Delta E_{\text{calc}}$ , kcal/mol) of human FcRn-Fc binding energy based on the implicit solvent model,<sup>1,2</sup> in comparison with the corresponding experimental data ( $\Delta\Delta G_{\text{expt}}$ , kcal/mol).

| Fc and its mutants                     | $\Delta\Delta E_{\text{calc}}^a$ | $\Delta\Delta G_{\text{expt}}^b$ | $K_d$ (nM) <sup>c</sup> | Ref. |
|----------------------------------------|----------------------------------|----------------------------------|-------------------------|------|
| Human IgG1-Fc                          | 0.00                             | 0.00                             | 2527±117                | 3    |
| I39A                                   | +36.25                           |                                  | N.D. <sup>d</sup>       | 3    |
| M38Y                                   | -20.40                           | -0.92                            | 532±37                  | 3    |
| M38W                                   | -14.72                           | -1.08                            | 408±24                  | 3    |
| M38F/T42D                              | -30.92                           | -0.59                            | 933±170                 | 3    |
| M38Y/T42Q                              | -10.33                           | -0.89                            | 560±102                 | 3    |
| N220F/Y222H                            | -63.13                           | -0.97                            | 493±7                   | 3    |
| M38Y/S40T/T42E                         | -16.82                           | -1.43                            | 225±10                  | 3    |
| V94T/L95P/Q97S                         | -15.27                           | -0.15                            | 1964±84                 | 3    |
| G171D/Q172P/N175S                      | -27.23                           | -0.09                            | 2164±331                | 3    |
| H219R/N220Y/Y222H                      | -56.50                           | -0.99                            | 472±61                  | 3    |
| H219K/N220F/Y222H                      | -58.41                           | -1.09                            | 399±47                  | 3    |
| G171R/Q172T/P173R/N175P                | -5.71                            | -0.26                            | 1620±61                 | 3    |
| M38Y/S40T/T42E/H219K/N220F/Y222H       | -44.94                           | -2.40                            | 44±3                    | 3    |
| M38Y/S40T/T42E/G171R/Q172T/P173R/N175P | -17.38                           | -1.39                            | 243±48                  | 3    |
| Human Fc                               | 0.00                             | 0.00                             | 1700±20                 | 4    |
| N220A                                  | -21.90                           | -0.65                            | 570±30                  | 4    |
| N220H                                  | -11.39                           | -0.90                            | 370±30                  | 4    |
| N220Y                                  | -65.57                           | -1.83                            | 78±12                   | 4    |
| N220W                                  | -58.55                           | -2.16                            | 44±5                    | 4    |
| A164V/N220A                            | -30.86                           | -0.87                            | 390±40                  | 4    |
| N220A/Y222I                            | -14.74                           | -0.95                            | 340±80                  | 4    |
| M38Y/N220A                             | -17.51                           | -1.21                            | 220±20                  | 4    |
| M214L/N220A                            | -14.17                           | -1.03                            | 300±40                  | 4    |
| V94P/N220Y                             | -61.88                           | -3.03                            | 10.2±1.8                | 4    |
| T93Q/N220A                             | -12.92                           | -1.17                            | 235±20                  | 4    |
| T36Q/M214L                             | -31.34                           | -1.17                            | 234±22                  | 4    |
| V94P/N220A                             | -23.93                           | -1.84                            | 76±10                   | 4    |
| T93Q/E166A/N220A                       | -11.20                           | -1.07                            | 280±10                  | 4    |
| M38Y/V94P/N220Y                        | -56.02                           | -3.63                            | 3.7±1.0                 | 4    |
| Human Fc                               | 0.00                             | 0.00                             | 37±5                    | 5    |
| D162V/N220H                            | -28.56                           | -1.60                            | 2.5±1.4                 | 5    |
| P43I/Q97I                              | -10.58                           | -1.76                            | 1.9±0.4                 | 5    |
| P43I/N220H                             | -10.87                           | -1.65                            | 2.3±0.2                 | 5    |

<sup>a</sup>Directly calculated binding free energy shift from human FcRn binding with wild-type human Fc to human FcRn binding with the mutant of human Fc.

<sup>b</sup>The binding free energy shift (from human FcRn binding with wild-type human Fc to human FcRn binding with the mutant of human Fc) derived from the experimentally measured dissociation constant ( $K_d$ ) change as according to equation  $\Delta\Delta G = RT \ln K_{d(\text{mutant})} / K_{d(\text{wild-type})}$ .

<sup>c</sup>The experimental dissociation constant for the FcRn-Fc binding reported in literature cited.

<sup>d</sup>No detectable binding.

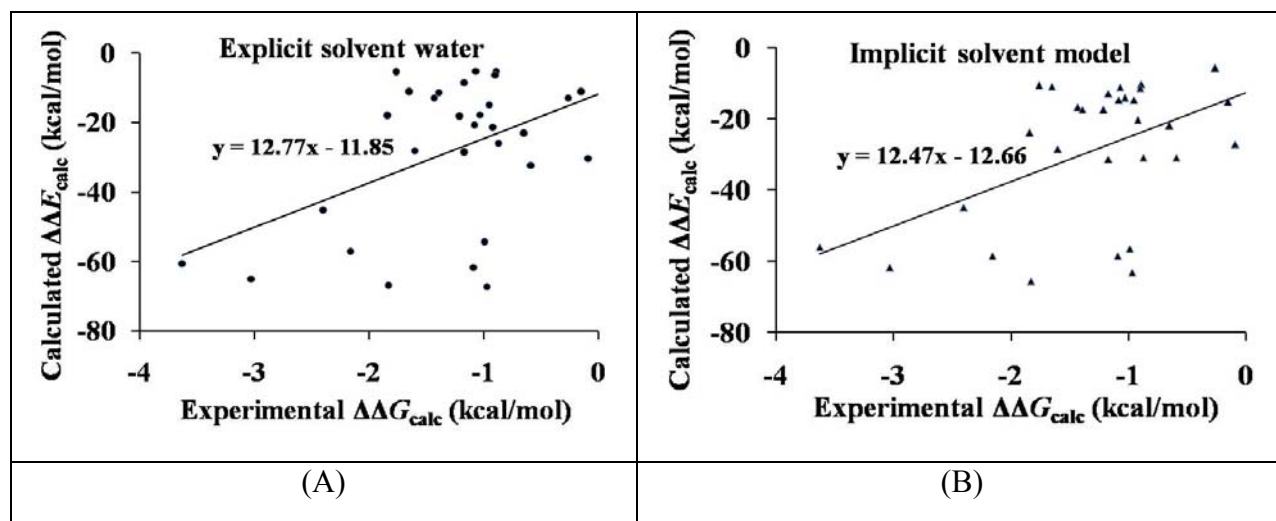

Figure S1. Plots of the calculated Fc mutation-caused shifts ( $\Delta\Delta E_{\text{calc}}$ , kcal/mol) of human FcRn-Fc binding energy (Table 2 in the text) vs the shifts of binding free energy ( $\Delta\Delta G_{\text{expt}}$ , kcal/mol) derived from experimentally measured  $K_d$  values based on the relationship of  $\Delta\Delta G = RT \ln K_{d(\text{mutant})} / K_{d(\text{wild-type})}$ . (A) The calculated results based on the explicit solvent water; and (B) the calculated results based on implicit solvent model, *i.e.* generalized born (GB)<sup>1,2</sup> model.

<sup>1</sup> G. D. Hawkins, C. J. Cramer, and D. G. Truhlar, *Chem. Phys. Lett.*, 1995, 246, 122–129.

<sup>2</sup> G. D. Hawkins, C. J. Cramer, and D. G. Truhlar, *J. Phys. Chem.*, 1996, 100, 19824–19839.

<sup>3</sup> W. F. Dall'Acqua, R. M. Woods, E. S. Ward, S. R. Palaszynski, N. K. Patel, Y. A. Brewah, H. Wu, P. A. Kiener, and S. Langermann, *J. Immunol.* 2002, 169, 5171-5180.

<sup>4</sup> Y. A. Yeung, M. K. Leabman, J. S. Marvin, J. Qiu, C. W. Adams, S. Lien, M. A. Starovasnik, and H. B. Lowman, *J. Immunol.* 2009, 182, 7663-7671.

<sup>5</sup> A. Datta-Mannan, D. R. Witcher, Y. Tang, J. Watkins, and W. Jiang, *Drug Metab. Dispo.* 2007, 35, 86-94.
